# Supplementary material for: Three-Dimensionally Cultured Jaw Periosteal Cells Attenuate Macrophage Activation of CD4+ T Cells and Inhibit Osteoclastogenesis
Source: MDPI journal article supplement (doi:10.3390/ijms25042355), 2024-02-16
Supplement: s1 [file s1]

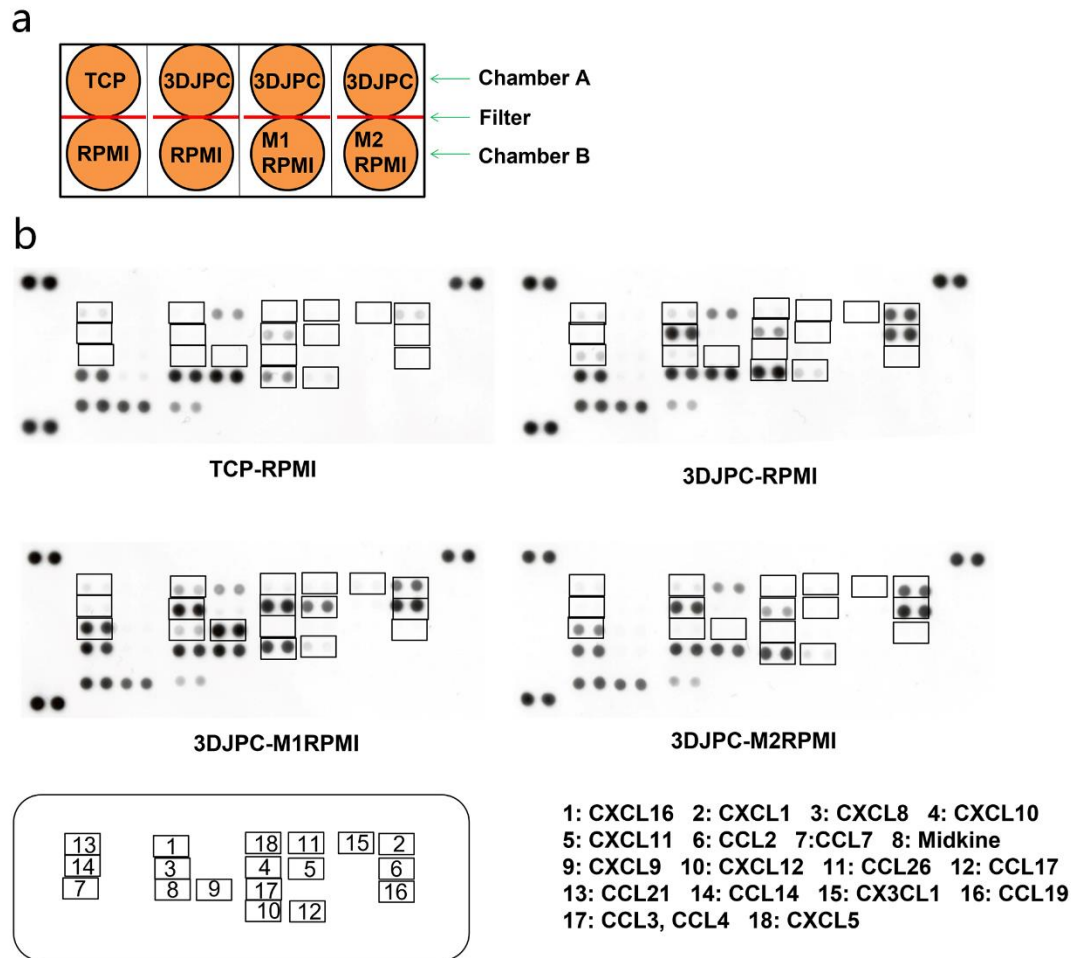

**Figure S1.** Chemokine secretion in supernatants from the 3DJPC monoculture experiment. **a:** Layout of the 3DJPC monoculture experiments (TCP: cell-free  $\beta$ -TCP scaffolds; 3DJPC: JPCs colonized  $\beta$ -TCP scaffolds; RPMI: cell-free RPMI complete medium; M1RPMI: cell-free RPMI complete medium + LPS + IFN- $\gamma$ ; M2RPMI: cell-free RPMI complete medium + IL-4 + IL-13). **b:** membranes with chemokine dot blots in different monoculture groups.

**Table S1.** List of chemokines detected in the supernatant of 3DJPCs monoculture experiment.

| Group     | Detected in medium | JPC     | LPS/IFN- $\gamma$ -stimulated 3DJPC | IL-4/IL-13-stimulated 3DJPC |
|-----------|--------------------|---------|-------------------------------------|-----------------------------|
| Chemokine | CXCL10             | CXCL16  | CXCL16                              | CXCL16                      |
|           | CXCL12             | CXCL1   | CXCL1                               | CXCL1                       |
|           | CXCL7              | CXCL10  | CXCL10                              | CXCL10                      |
|           | CXCL4              | CXCL12  | CXCL12                              | CXCL12                      |
|           | CCL5               | CXCL8   | CXCL8                               | CXCL8                       |
|           | Chemerin           | CCL2    | CCL2                                | CCL2                        |
|           | CXCL1              | CCL3    | CCL3                                | CCL3                        |
|           | CCL17              | CCL7    | CCL7                                | CCL7                        |
|           | CCL21              | Midkine | Midkine                             | Midkine                     |
|           | CCL18              | CXCL5   | CXCL5                               | CXCL5                       |
|           |                    | CCL26   | CCL26                               | CCL26                       |
|           |                    | CCL19   | CCL17                               | CCL19                       |
|           |                    | CCL17   | CX3CL1                              | CCL17                       |
|           |                    |         | CCL14                               |                             |
|           |                    |         | CXCL11                              |                             |
|           |                    |         | CXCL9                               |                             |
